# Supplementary material
Source: publisher figshare collection journal article supplement (https://acs.figshare.com/ndownloader/files/3870313)

## Supplementary Information

### **Rapid *in vitro* metabolism of the flame retardant triphenyl phosphate and effects on cytotoxicity and mRNA expression in chicken embryonic hepatocytes**

Guanyong Su,<sup>†,‡</sup> Doug Crump,<sup>†,\*</sup> Robert J. Letcher,<sup>†,‡,\*</sup> Sean W. Kennedy,<sup>†,§</sup>

<sup>†</sup> Environment Canada, National Wildlife Research Centre, Ottawa, ON, K1A 0H3, Canada

<sup>‡</sup> Department of Chemistry, Carleton University, Ottawa, ON, K1S 5B6, Canada

<sup>§</sup> Centre for Advanced Research in Environmental Genomics, Department of Biology, University of Ottawa, Ottawa, Ontario, Canada

\* Corresponding author.

Phone +1-613-998-7383 (D. C.) and 1-613-998-6696 (R. J. L.); Fax +1-613-998-0458

(D.C. and R.J.L.); E-mail: Doug.Crump@ec.gc.ca (D.C.) and

Robert.Letcher@ec.gc.ca (R.J.L.)

Table S1. Pathways, RefSeq accession numbers and descriptions of 32 genes on the Avian ToxChip PCR array

| Pathway                                 | Gene<br>Symbol   | RefSeq<br>Accession | Description                                                                          |
|-----------------------------------------|------------------|---------------------|--------------------------------------------------------------------------------------|
| Phase I and II<br>Metabolism            | CYP3A37          | NM_001001751        | Cytochrome P450 A 37                                                                 |
|                                         | CYP1A4           | NM_205147           | Cytochrome P450 1A4                                                                  |
|                                         | UGT1A9           | XM_001234353        | UDP glucuronosyltransferase 1 family,<br>polypeptide A9                              |
|                                         | SULT1B1          | NM_204545           | Sulfotransferase family, cytosolic, 1B, member 1                                     |
|                                         | SULT1E1          | NM_420616           | Sulfotransferase family 1E, estrogen-preferring<br>member 1                          |
| Immune<br>Function                      | BATF3            | XM_419428           | Basic leucine zipper transcription factor, ATF-like<br>3                             |
|                                         | IL16             | NM_204352           | Interleukin 16 (lymphocyte chemoattractant<br>factor)                                |
|                                         | HSP90AB1         | NM_206959           | Heat shock 90kDa protein 1, beta                                                     |
| Glucose and<br>fatty acid<br>metabolism | PDK4             | NM_001199909        | Pyruvate dehydrogenase kinase, isozyme 4                                             |
| Oxidative<br>Stress                     | MT4              | NM_205275           | Metallothionein 4                                                                    |
|                                         | TXN              | NM_205453           | Thioredoxin                                                                          |
| Lipid/Cholest<br>erol<br>Metabolism     | ACSL5            | NM_001031237        | Acyl-CoA synthetase long-chain family member 5                                       |
|                                         | HMGCR            | NM_204485           | 3-hydroxy-3-methylglutaryl-Coenzyme A<br>reductase                                   |
|                                         | SLCO1A2          | XM_416421           | Solute carrier organic anion transporter family,<br>member 1A2                       |
|                                         | LBFABP           | NM_204634           | Fatty acid binding protein 1, liver                                                  |
|                                         | CD36             | NM_001030731        | CD36 molecule (thrombospondin receptor)                                              |
|                                         | SCD              | NM_204890           | Stearoyl-CoA desaturase (delta-9-desaturase)                                         |
| Thyroid<br>Hormone<br>Pathway           | TTR              | NM_205335           | Transthyretin                                                                        |
|                                         | DIO1             | NM_001097614        | Deiodinase, iodothyronine, type I                                                    |
|                                         | THRSP            | NM_213577           | Thyroid hormone responsive (SPOT14 homolog,<br>rat)                                  |
|                                         | IGF1             | NM_001004384        | Insulin-like growth factor 1 (somatomedin C)                                         |
|                                         | NCOA3            | XM_417385           | Nuclear receptor coactivator 3                                                       |
| FXR and<br>LXR                          | CYP7B1           | XM_418276           | Cytochrome P450, family 7, subfamily B,<br>polypeptide 1                             |
| Cell Death                              | CASP1            | NM_204924           | Caspase 1, apoptosis-related cysteine peptidase<br>(interleukin 1, beta, convertase) |
|                                         | LOC100859<br>733 | XM_003641931        | Cell death activator CIDE-3-like                                                     |
| Steatosis                               | HSD3B1           | NM_205118           | Hydroxy-delta-5-steroid dehydrogenase, 3 beta-<br>and steroid delta-isomerase 1      |
| Steroid                                 | ALAS1            | NM_001018012        | Aminolevulinate, delta, synthase 1                                                   |

| Metabolism |        |              |                                                    |
|------------|--------|--------------|----------------------------------------------------|
|            | EEF1A1 | NM_204157    | Eukaryotic translation elongation factor 1 alpha 1 |
|            | RPL4   | NM_001007479 | Ribosomal protein L4                               |
| Controls   | GGDC   | SA_00517     | Chicken Genomic DNA Contamination                  |
|            | RTC    | SA_00104     | Reverse Transcription Control                      |
|            | PPC    | SA_00103     | Positive PCR Control                               |

Table S2. Instrumental parameters, selected reaction monitoring (SRM) mass-to-charge ( $m/z$ ) transitions, performance evaluation results (instrumental linearity, precision (RSD %), and method limit of quantification (MLOQ) for triphenyl phosphate (TPHP) and diphenyl phosphate (DPHP) using the method based on liquid chromatography-electrospray ionization-triple quadrupole mass spectrometry (LC-ESI-MS/MS) operating in the positive mode.

| Compound                             | Acronym               | SRM ion transitions ( $m/z$ ) | Cone voltage(V) | Collision energy (eV) | Linearity, $R^2$ (0.2-200 ng/mL) <sup>a</sup> | MLOQ (ng/mL, injection concentration) | Precision (RSD %) (20 ng/mL) | Matrix effects (%) <sup>b</sup> |
|--------------------------------------|-----------------------|-------------------------------|-----------------|-----------------------|-----------------------------------------------|---------------------------------------|------------------------------|---------------------------------|
| Diphenyl phosphate                   | DPHP                  | 507.3>243.3                   | 67              | 28                    | 0.9989                                        | 0.19                                  | n/a                          | n/a                             |
| d <sub>10</sub> -diphenyl phosphate  | d <sub>10</sub> -DPHP | 517.4>243.3                   | 42              | 28                    | n/a                                           | n/a                                   | 5.5                          | 94±4                            |
| Triphenyl phosphate                  | TPHP                  | 327.1>77.1                    | 100             | 40                    | 0.9986                                        | 0.19                                  | n/a                          | n/a                             |
| d <sub>15</sub> -triphenyl phosphate | d <sub>15</sub> -TPHP | 342.2>82.0                    | 100             | 40                    | n/a                                           | n/a                                   | 4.2                          | 94±5                            |

<sup>a</sup> Six concentration points included 0.2, 1, 5, 20, 50 and 200 ng/mL, respectively.

<sup>b</sup> Minimal ESI(+) matrix effects were demonstrated by the ESI(+) response of 20 ng/mL for the TPHP and DPHP internal standards in treated medium/cell samples as compared to the pure internal standards, with values of 94 ± 4% and 94 ± 5% for d<sub>15</sub>-TPHP and d<sub>10</sub>-DPHP, respectively.

Table S3. Compound-dependent operation parameters and the precursor and daughter ions monitored **using** Waters ACQUITY UPLC<sup>®</sup> I-Class system coupled to Waters<sup>®</sup> Xevo<sup>™</sup> TQ-S mass spectrometer (UPLC-TQ-S/MS) operated in multiple reaction monitoring (MRM) mode.

| Compounds <sup>a</sup>  | Precursor ion<br>( <i>m/z</i> ) | Daughter ion<br>( <i>m/z</i> ) | cone voltage<br>(v) | collision energy<br>(eV) |
|-------------------------|---------------------------------|--------------------------------|---------------------|--------------------------|
| PHP                     | 172.83                          | 78.94                          | 10                  | 20                       |
| OH-TPHP                 | 343.07                          | 76.88                          | 10                  | 30                       |
| (OH) <sub>2</sub> -TPHP | 359.07                          | 76.88                          | 10                  | 30                       |

<sup>a</sup>The electrospray ionization (ESI) was operated in negative mode for PHP analysis and positive mode for OH-TPHP and (OH)<sub>2</sub>-TPHP analysis.

Table S4. Fold changes and *p*-values of 27 target genes on the Avian ToxChip PCR array following exposure of chicken embryonic hepatocytes to 10  $\mu$ M TPHP or DPHP, respectively. The fold change represents the mean value of three replicates and significant differences in fold change compared to the DMSO vehicle control were determined using a Student's *t*-test. The numbers in red signify that the mRNA levels were significantly altered (fold change  $\geq 1.5$ , *p*<0.05).

| Symbol       | TPHP         |              | DPHP         |              |
|--------------|--------------|--------------|--------------|--------------|
|              | p value      | Fold Change  | p value      | Fold Change  |
| CYP3A37      | 0.018        | 1.26         | <b>0.001</b> | <b>-1.68</b> |
| CYP1A4       | 0.166        | 4.31         | 0.223        | 1.78         |
| UGT1A9       | 0.081        | 1.46         | 0.236        | 1.26         |
| SULT1B1      | 0.235        | 1.14         | 0.266        | 1.11         |
| BATF3        | 0.221        | 1.27         | 0.868        | 1.02         |
| PDK4         | <b>0.002</b> | <b>-2.46</b> | <b>0.001</b> | <b>-2.54</b> |
| TXN          | 0.033        | 1.30         | 0.237        | 1.16         |
| ACSL5        | 0.134        | -1.33        | <b>0.005</b> | <b>-2.05</b> |
| HMGCR        | 0.001        | -1.48        | <b>0.000</b> | <b>-2.11</b> |
| SLCO1A2      | 0.201        | -1.12        | <b>0.002</b> | <b>-1.59</b> |
| TTR          | 0.325        | -1.11        | 0.025        | -1.47        |
| DIO1         | 0.629        | -1.04        | <b>0.009</b> | <b>-1.86</b> |
| THRSP        | <b>0.000</b> | <b>-1.83</b> | <b>0.002</b> | <b>-1.65</b> |
| IGF1         | <b>0.022</b> | <b>-1.63</b> | 0.275        | 1.20         |
| NCOA3        | 0.086        | -1.28        | 0.273        | -1.17        |
| SULT1E1      | 0.002        | 1.30         | 0.630        | 1.02         |
| CYP7B1       | 0.084        | -1.31        | <b>0.001</b> | <b>-3.05</b> |
| CASP1        | 0.002        | -1.34        | 0.162        | -1.08        |
| LOC100859733 | 0.074        | 1.24         | 0.279        | -1.13        |
| HSD3B1       | 0.755        | -1.05        | 0.749        | 1.05         |
| ALAS1        | 0.020        | 1.24         | 0.196        | 1.11         |
| IL16         | 0.878        | -1.01        | 0.816        | 1.02         |
| MT4          | <b>0.003</b> | <b>2.08</b>  | 0.346        | 1.25         |
| HSP90AB1     | 0.511        | -1.08        | 0.713        | -1.04        |
| CD36         | 0.281        | -1.68        | <b>0.010</b> | <b>-2.35</b> |
| SCD          | 0.669        | -1.04        | 0.621        | -1.05        |
| LBFABP       | 0.082        | 1.18         | 0.925        | 1.01         |

Figure S1. Chemical structures of triphenyl phosphate (TPHP), diphenyl phosphate (DHP) and phenyl phosphate (PHP). The hydrogen atoms are omitted for clarity.

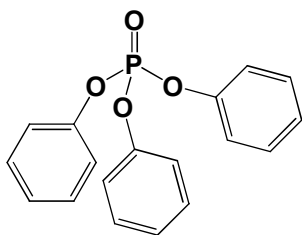

**triphenyl phosphate**

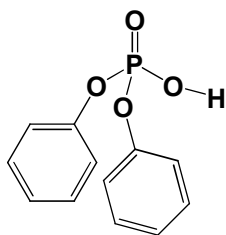

**diphenyl phosphate**

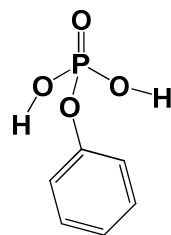

**phenyl phosphate**

Figure S2. Cytotoxic effects of diphenyl phosphate (DPHP) in chicken embryonic hepatocytes (CEH). CEH were treated with different concentrations (0.01, 0.1, 1, 10, 100 and 1000  $\mu$ M) of DPHP for 36 h. One-way ANOVA was conducted to compare viability of each treatment group to the DMSO control; no significant differences were observed for any of the treatment groups. ( $p>0.05$ )

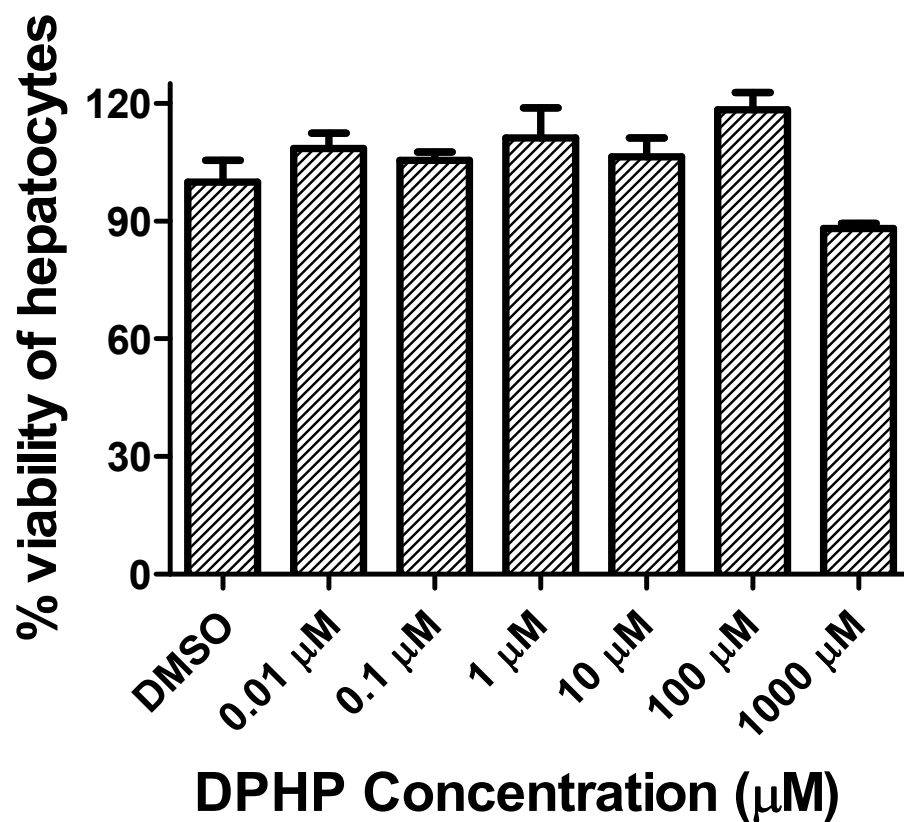

Figure S3. Total ion chromatogram of culture medium of triphenyl phosphate (TPHP)-exposed chicken embryonic hepatocytes using Waters ACQUITY UPLC® I-Class system coupled to Waters® Xevo™ TQ-S mass spectrometer (UPLC-TQ-S/MS) operated in daughters scan mode (daughter ions of  $m/z$  343.07 (upper, A) and  $m/z$  359.07 (lower, B and C), respectively). See the detailed daughter ions of peak A, B, and C in Figure S4.

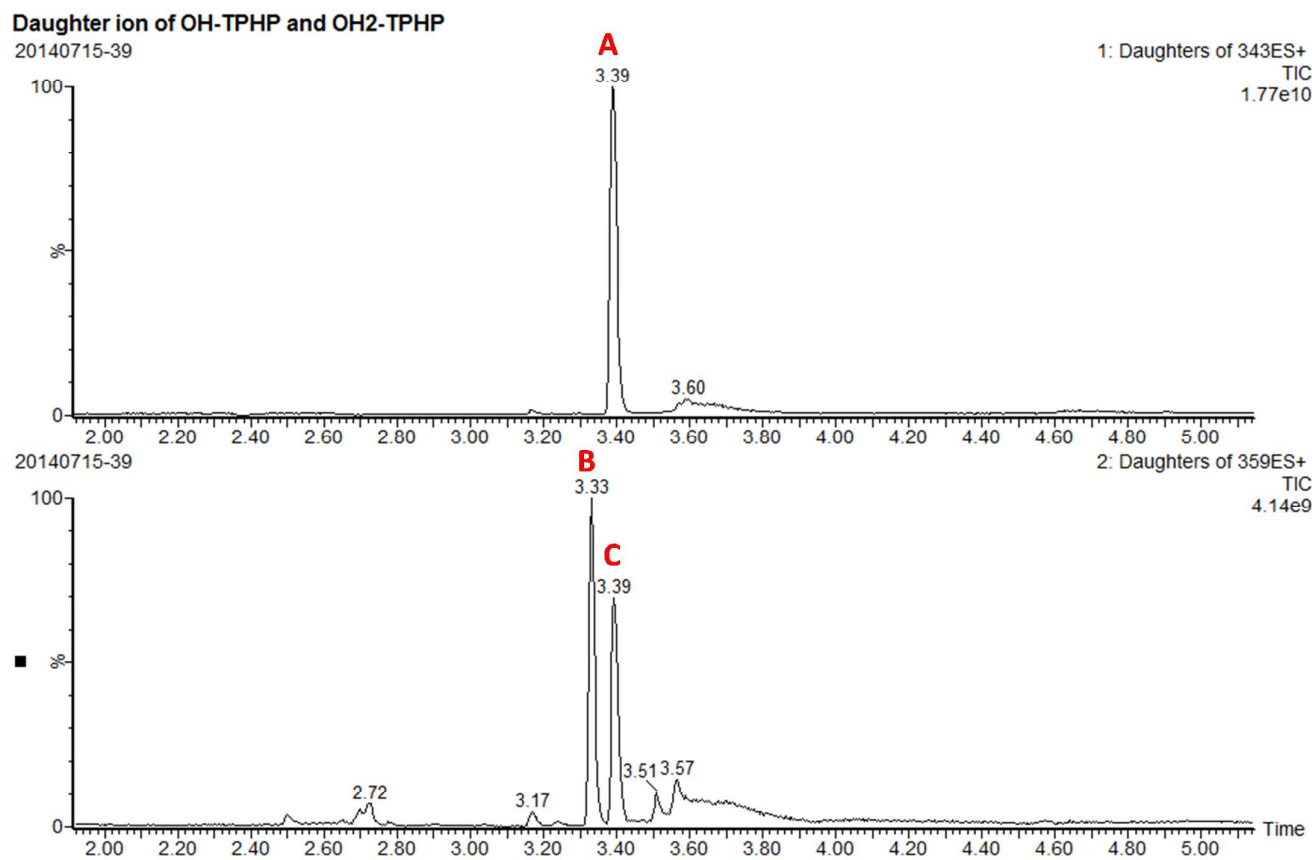

Figure S4. Daughter ions of  $m/z$  343.07 (A) and  $m/z$  359.07 (B and C) using Waters ACQUITY UPLC<sup>®</sup> I-Class system coupled to Waters<sup>®</sup> Xevo<sup>™</sup> TQ-S mass spectrometer (UPLC-TQ-S/MS) operated in daughters scan mode. Daughter ion 'A' was assigned to be OH-TPHP; 'B' and 'C' were assigned to two (OH)<sub>2</sub>-TPHP isomers. See the total ion chromatogram of peak A, B and C in the Figure S3.

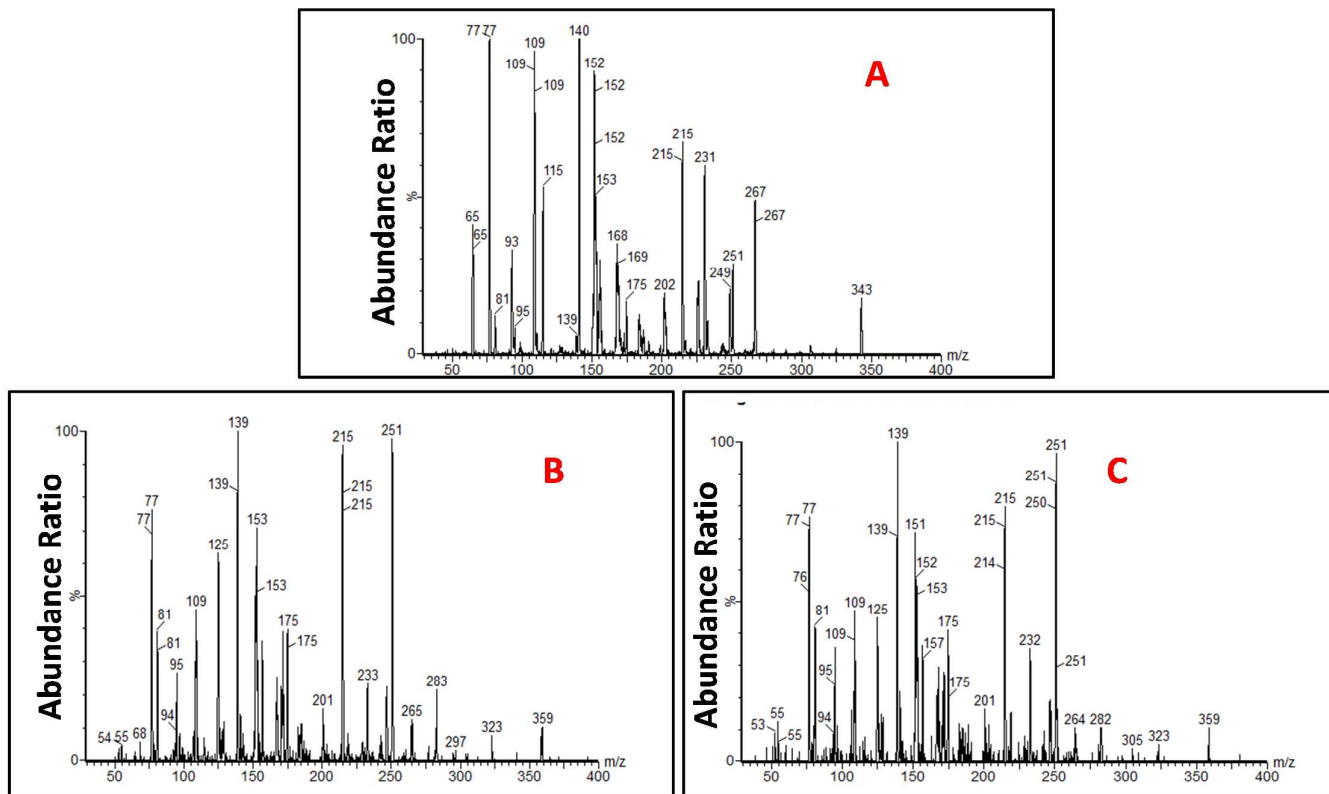

Figure S5. Response comparison between the initial TPHP concentration (retention time (RT) = 4.56) and formed OH-TPHP (RT = 3.37) in chicken embryonic hepatocyte (CEH) samples. This total ion chromatogram was generated by injecting 1:1 CEH medium (collected at 0 and 36 h, respectively) mixture into Waters ACQUITY UPLC<sup>®</sup> I-Class system coupled to a Waters<sup>®</sup> Xevo<sup>™</sup> TQ-S mass spectrometer (UPLC-TQ-S/MS) operated in multiple reaction monitoring (MRM) mode.

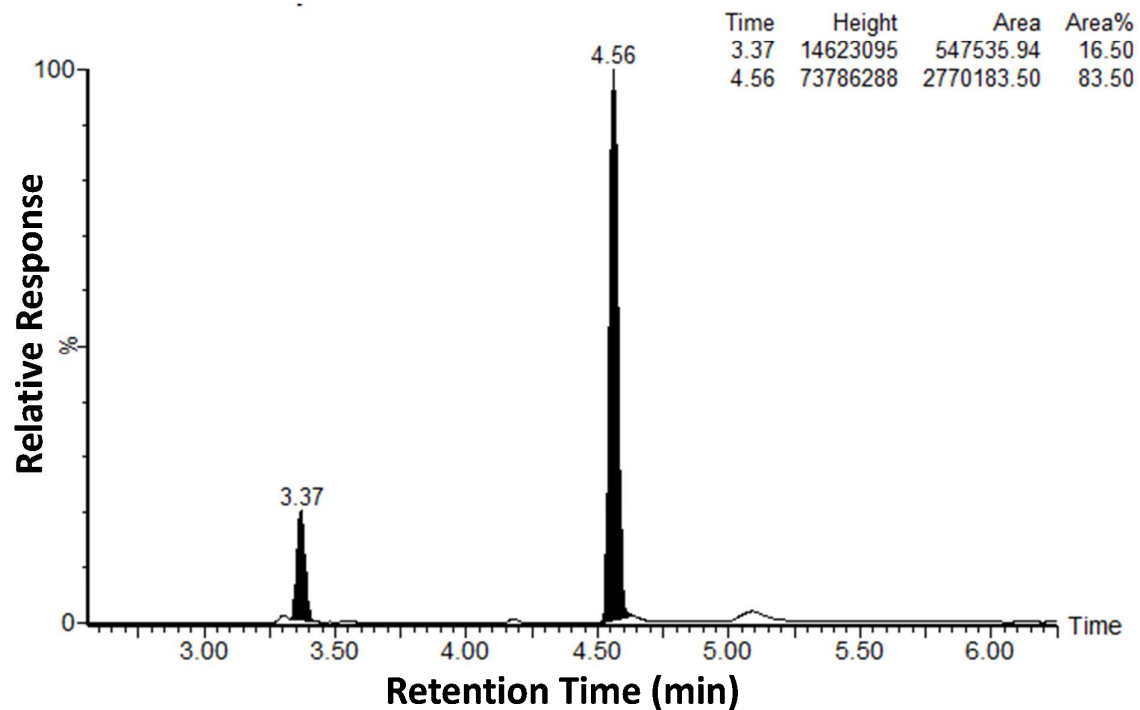

Supplement: Supplementary file 1 [file 3870313]
